# Supplementary material for: Short-Term Exposure to Violet Light Emitted from Eyeglass Frames in Myopic Children: A Randomized Pilot Clinical Trial
Source: MDPI journal article supplement (doi:10.3390/jcm11206000), 2022-10-11
Supplement: s1 [file s1]

## **Supplementary Materials**

Torii H, Mori K et al. Short-Term Exposure to Violet Light Emitted from Eyeglass Frames in Myopic Children: A Randomized Pilot Clinical Trial

Number of Tables: 8

Titles of Tables:

**Table S1. Specifications of VLf.**

**Table S2. Safety results regarding visual acuity, intraocular pressure, fluorescein corneal and conjunctival staining scores, tear film break-up time, and corneal endothelial cell density.**

**Tables S3–S5. Results of the mixed-effects model fitted to the 6-month changes in the cycloplegic objective/subjective refractions and axial length in both eyes in the subgroup analysis (second-half cases aged 8 to 10 years; n = 30 eyes comprised of 10 and 20 eyes in the VLf and placebo groups, respectively).**

**Tables S6–S8. The adjusted mean changes in the cycloplegic objective and subjective refractions and axial length in both eyes at each visit in the subgroup analysis (second half cases aged 8 to 10 years; n = 30 eyes comprised of 10 and 20 eyes in the VLf and placebo groups, respectively).**

**Table S1. Specifications of VLf.**

|                                            |                                                                                                                                                                                                                                                                                                                                                                         |
|--------------------------------------------|-------------------------------------------------------------------------------------------------------------------------------------------------------------------------------------------------------------------------------------------------------------------------------------------------------------------------------------------------------------------------|
| Irradiation method                         | <p>Violet light (VL) with a wavelength between 360-400 nm is irradiated into the eyes.</p> <p>VL light-emitting diodes are positioned on both sides of the upper left and right parts of the eyeglass frame, directed toward the face.</p> <p>The irradiation angle from the eyeglass reference line of sight is 53°.</p> <p>Lights are manually turned on and off.</p> |
| Irradiance reference values                | <p>Irradiance reference value for ocular alignment:<br/>310 <math>\mu\text{W}/\text{cm}^2</math> +100%, -50% (VLf trial device),<br/>10 <math>\mu\text{W}/\text{cm}^2</math> +100%, -50% (control device)</p>                                                                                                                                                           |
| Electronic circuits                        | <p>The device is equipped with charging, power switch, exposure time control, and back-up circuits.</p> <p>The exposure record may be transmitted via bluetooth low energy.</p>                                                                                                                                                                                         |
| Power supply                               | <p>Lithium-ion battery</p> <p>Voltage: 3.7 volt (V)</p> <p>Capacitance: 200 milli-Ampere-hour</p> <p>Charged via universal serial bus power supply (including personal computer, AC100V switching power)</p>                                                                                                                                                            |
| Operating environment temperature/humidity | +5 to +40°C, 30 to 90% relative humidity                                                                                                                                                                                                                                                                                                                                |
| Storage environment temperature/humidity   | -20 to +60°C, 10% to 95% relative humidity                                                                                                                                                                                                                                                                                                                              |
| External dimensions                        | <p>Approximate width (W) 130 to 155 mm x depth (D) 145 to 170 mm x height (H) 36 mm</p> <p>Approximate W 140 to 180 mm x D 35 to 45 mm x H 50 mm when folded</p>                                                                                                                                                                                                        |
| Weight                                     | Approximately 36 g                                                                                                                                                                                                                                                                                                                                                      |

**Table S2. Safety results regarding visual acuity, intraocular pressure, fluorescein corneal and conjunctival staining scores, tear film break-up time, and corneal endothelial cell density.**

| Item                        | Eye | Visit        | VLf   |       |      |                      |       |      | Control |       |      |                      |       |      |       | p Value |
|-----------------------------|-----|--------------|-------|-------|------|----------------------|-------|------|---------|-------|------|----------------------|-------|------|-------|---------|
|                             |     |              | Value |       |      | Change from Baseline |       |      | Value   |       |      | Change from Baseline |       |      |       |         |
|                             |     |              | N     | Mean  | SD   | N                    | Mean  | SD   | N       | Mean  | SD   | N                    | Mean  | SD   |       |         |
| UCVA (logMAR)               | R   | Baseline     | 21    | 0.82  | 0.23 | —                    | —     | —    | 20      | 0.85  | 0.28 | —                    | —     | —    | —     |         |
|                             |     | 4 weeks      | 21    | 0.89  | 0.21 | 21                   | 0.08  | 0.15 | 20      | 0.86  | 0.22 | 20                   | 0.01  | 0.18 | 0.183 |         |
|                             |     | 12 weeks     | 18    | 0.77  | 0.24 | 18                   | -0.04 | 0.18 | 16      | 0.89  | 0.19 | 16                   | -0.03 | 0.16 | 0.466 |         |
|                             |     | 24 weeks     | 18    | 0.86  | 0.21 | 18                   | 0.05  | 0.19 | 15      | 0.96  | 0.25 | 15                   | 0.01  | 0.21 | 0.910 |         |
|                             |     | Discontinued | 2     | 1.22  | 0.00 | 2                    | 0.11  | 0.16 | 3       | 0.74  | 0.24 | 3                    | 0.10  | 0.17 | —     |         |
|                             | L   | Baseline     | 21    | 0.80  | 0.24 | —                    | —     | —    | 20      | 0.88  | 0.21 | —                    | —     | —    | —     |         |
|                             |     | 4 weeks      | 21    | 0.85  | 0.18 | 21                   | 0.04  | 0.17 | 20      | 0.88  | 0.18 | 20                   | 0.01  | 0.17 | 0.906 |         |
|                             |     | 12 weeks     | 18    | 0.84  | 0.22 | 18                   | 0.02  | 0.16 | 16      | 0.91  | 0.16 | 16                   | -0.04 | 0.13 | 0.747 |         |
|                             |     | 24 weeks     | 18    | 0.88  | 0.18 | 18                   | 0.07  | 0.18 | 15      | 0.95  | 0.23 | 15                   | -0.01 | 0.22 | 0.837 |         |
|                             |     | Discontinued | 2     | 1.11  | 0.16 | 2                    | 0.15  | 0.21 | 3       | 0.84  | 0.15 | 3                    | 0.14  | 0.15 | —     |         |
|                             | B   | Baseline     | 42    | 0.81  | 0.23 | —                    | —     | —    | 40      | 0.86  | 0.25 | —                    | —     | —    | —     |         |
|                             |     | 4 weeks      | 42    | 0.87  | 0.19 | 42                   | 0.06  | 0.16 | 40      | 0.87  | 0.20 | 40                   | 0.01  | 0.17 | 0.435 |         |
|                             |     | 12 weeks     | 36    | 0.81  | 0.23 | 36                   | -0.01 | 0.17 | 32      | 0.90  | 0.17 | 32                   | -0.04 | 0.14 | 0.847 |         |
|                             |     | 24 weeks     | 36    | 0.87  | 0.19 | 36                   | 0.06  | 0.18 | 30      | 0.95  | 0.24 | 30                   | 0.00  | 0.21 | 0.893 |         |
|                             |     | Discontinued | 4     | 1.17  | 0.11 | 4                    | 0.13  | 0.15 | 6       | 0.79  | 0.19 | 6                    | 0.12  | 0.15 | —     |         |
| BCVA (logMAR)               | R   | Baseline     | 21    | -0.09 | 0.03 | —                    | —     | —    | 20      | -0.08 | 0.03 | —                    | —     | —    | —     |         |
|                             |     | 4 weeks      | 21    | -0.08 | 0.00 | 21                   | 0.01  | 0.03 | 20      | -0.08 | 0.04 | 20                   | 0.00  | 0.03 | —*    |         |
|                             |     | 12 weeks     | 18    | -0.08 | 0.00 | 18                   | 0.01  | 0.02 | 16      | -0.07 | 0.02 | 16                   | 0.01  | 0.02 | —*    |         |
|                             |     | 24 weeks     | 18    | -0.06 | 0.07 | 18                   | 0.02  | 0.07 | 16      | -0.07 | 0.02 | 16                   | 0.01  | 0.02 | —*    |         |
|                             |     | Discontinued | 2     | -0.08 | 0.00 | 2                    | 0.05  | 0.07 | 3       | -0.08 | 0.00 | 3                    | 0.00  | 0.00 | —*    |         |
|                             | L   | Baseline     | 21    | -0.09 | 0.03 | —                    | —     | —    | 20      | -0.08 | 0.02 | —                    | —     | —    | —     |         |
|                             |     | 4 weeks      | 21    | -0.08 | 0.00 | 21                   | 0.01  | 0.03 | 20      | -0.08 | 0.04 | 20                   | 0.01  | 0.04 | —*    |         |
|                             |     | 12 weeks     | 18    | -0.08 | 0.00 | 18                   | 0.01  | 0.02 | 16      | -0.07 | 0.02 | 16                   | 0.01  | 0.03 | —*    |         |
|                             |     | 24 weeks     | 18    | -0.06 | 0.07 | 18                   | 0.02  | 0.07 | 16      | -0.07 | 0.02 | 16                   | 0.01  | 0.03 | —*    |         |
|                             |     | Discontinued | 2     | -0.08 | 0.00 | 2                    | 0.05  | 0.07 | 3       | -0.08 | 0.00 | 3                    | 0.00  | 0.00 | —*    |         |
|                             | B   | Baseline     | 42    | -0.09 | 0.03 | —                    | —     | —    | 40      | -0.08 | 0.03 | —                    | —     | —    | —     |         |
|                             |     | 4 weeks      | 42    | -0.08 | 0.00 | 42                   | 0.01  | 0.03 | 40      | -0.08 | 0.04 | 40                   | 0.00  | 0.04 | —*    |         |
|                             |     | 12 weeks     | 36    | -0.08 | 0.00 | 36                   | 0.01  | 0.02 | 32      | -0.07 | 0.02 | 32                   | 0.01  | 0.03 | —*    |         |
|                             |     | 24 weeks     | 36    | -0.06 | 0.07 | 36                   | 0.02  | 0.07 | 32      | -0.07 | 0.02 | 32                   | 0.01  | 0.03 | —*    |         |
|                             |     | Discontinued | 4     | -0.08 | 0.00 | 4                    | 0.05  | 0.06 | 6       | -0.08 | 0.00 | 6                    | 0.00  | 0.00 | —*    |         |
| Intraocular pressure (mmHg) | R   | Baseline     | 21    | 17.10 | 2.10 | —                    | —     | —    | 20      | 17.75 | 2.53 | —                    | —     | —    | —     |         |
|                             |     | 4 weeks      | 21    | 17.10 | 3.18 | 21                   | 0.00  | 2.32 | 20      | 17.40 | 2.50 | 20                   | -0.35 | 2.30 | 0.802 |         |
|                             |     | 12 weeks     | 18    | 16.67 | 3.34 | 18                   | -0.33 | 2.99 | 16      | 17.50 | 2.48 | 16                   | -0.63 | 3.05 | 0.783 |         |
|                             |     | 24 weeks     | 19    | 16.68 | 3.70 | 19                   | -0.26 | 3.11 | 16      | 18.25 | 2.59 | 16                   | 0.13  | 2.66 | 0.646 |         |
|                             |     | Discontinued | 2     | 20.00 | 5.66 | 2                    | 1.50  | 2.12 | 3       | 13.00 | 2.65 | 3                    | -2.67 | 1.53 | —     |         |
|                             | L   | Baseline     | 21    | 17.00 | 3.11 | —                    | —     | —    | 20      | 17.15 | 2.56 | —                    | —     | —    | —     |         |
|                             |     | 4 weeks      | 21    | 16.10 | 2.43 | 21                   | -0.90 | 3.11 | 20      | 17.35 | 2.30 | 20                   | 0.20  | 1.47 | 0.067 |         |
|                             |     | 12 weeks     | 18    | 15.94 | 3.26 | 18                   | -0.89 | 2.59 | 16      | 17.81 | 2.29 | 16                   | 0.44  | 2.19 | 0.053 |         |
|                             |     | 24 weeks     | 19    | 16.11 | 3.28 | 19                   | -0.95 | 2.20 | 16      | 17.81 | 2.69 | 16                   | 0.44  | 2.53 | 0.061 |         |
|                             |     | Discontinued | 2     | 14.50 | 0.71 | 2                    | -2.00 | 4.24 | 3       | 14.33 | 2.52 | 3                    | -0.67 | 2.08 | —     |         |
|                             | B   | Baseline     | 42    | 17.05 | 2.62 | —                    | —     | —    | 40      | 17.45 | 2.53 | —                    | —     | —    | —     |         |
|                             |     | 4 weeks      | 42    | 16.60 | 2.84 | 42                   | -0.45 | 2.75 | 40      | 17.38 | 2.37 | 40                   | -0.08 | 1.93 | 0.299 |         |
|                             |     | 12 weeks     | 36    | 16.31 | 3.28 | 36                   | -0.61 | 2.77 | 32      | 17.66 | 2.35 | 32                   | -0.09 | 2.67 | 0.254 |         |
|                             |     | 24 weeks     | 38    | 16.39 | 3.46 | 38                   | -0.61 | 2.68 | 32      | 18.03 | 2.61 | 32                   | 0.28  | 2.56 | 0.117 |         |
|                             |     | Discontinued | 4     | 17.25 | 4.57 | 4                    | -0.25 | 3.40 | 6       | 13.67 | 2.42 | 6                    | -1.67 | 1.97 | —     |         |
| Fluorescein                 | R   | Baseline     | 21    | 0.1   | 0.3  | —                    | —     | —    | 20      | 0.1   | 0.3  | —                    | —     | —    | —     |         |

|                                                           |   |              |    |        |       |    |       |       |    |        |       |    |        |       |       |
|-----------------------------------------------------------|---|--------------|----|--------|-------|----|-------|-------|----|--------|-------|----|--------|-------|-------|
| corneal and conjunctival staining score                   |   | 4 weeks      | 21 | 0.0    | 0.0   | 21 | -0.1  | 0.3   | 20 | 0.2    | 0.4   | 20 | 0.1    | 0.5   | 0.081 |
|                                                           |   | 12 weeks     | 18 | 0.1    | 0.2   | 18 | -0.1  | 0.2   | 16 | 0.2    | 0.4   | 16 | 0.1    | 0.4   | 0.198 |
|                                                           |   | 24 weeks     | 19 | 0.1    | 0.2   | 19 | -0.1  | 0.2   | 16 | 0.0    | 0.0   | 16 | -0.1   | 0.3   | 0.294 |
|                                                           |   | Discontinued | 2  | 0.0    | 0.0   | 2  | 0.0   | 0.0   | 3  | 0.0    | 0.0   | 3  | 0.0    | 0.0   | —     |
|                                                           | L | Baseline     | 21 | 0.0    | 0.2   | —  | —     | —     | 20 | 0.1    | 0.2   | —  | —      | —     | —     |
|                                                           |   | 4 weeks      | 21 | 0.1    | 0.3   | 21 | 0.0   | 0.2   | 20 | 0.1    | 0.2   | 20 | 0.0    | 0.0   | 0.372 |
|                                                           |   | 12 weeks     | 18 | 0.1    | 0.2   | 18 | 0.0   | 0.3   | 16 | 0.1    | 0.3   | 16 | 0.0    | 0.4   | 0.951 |
|                                                           |   | 24 weeks     | 19 | 0.1    | 0.2   | 19 | 0.0   | 0.0   | 16 | 0.0    | 0.0   | 16 | -0.1   | 0.3   | 0.194 |
|                                                           |   | Discontinued | 2  | 0.0    | 0.0   | 2  | 0.0   | 0.0   | 3  | 0.0    | 0.0   | 3  | 0.0    | 0.0   | —     |
|                                                           | B | Baseline     | 42 | 0.1    | 0.3   | —  | —     | —     | 40 | 0.1    | 0.3   | —  | —      | —     | —     |
|                                                           |   | 4 weeks      | 42 | 0.0    | 0.2   | 42 | 0.0   | 0.3   | 40 | 0.1    | 0.3   | 40 | 0.0    | 0.4   | 0.362 |
|                                                           |   | 12 weeks     | 36 | 0.1    | 0.2   | 36 | 0.0   | 0.3   | 32 | 0.1    | 0.3   | 32 | 0.0    | 0.4   | 0.294 |
|                                                           |   | 24 weeks     | 38 | 0.1    | 0.2   | 38 | 0.0   | 0.2   | 32 | 0.0    | 0.0   | 32 | -0.1   | 0.3   | 0.097 |
|                                                           |   | Discontinued | 4  | 0.0    | 0.0   | 4  | 0.0   | 0.0   | 6  | 0.0    | 0.0   | 6  | 0.0    | 0.0   | —     |
| BUT (seconds)                                             | R | Baseline     | 21 | 7.17   | 2.61  | —  | —     | —     | 20 | 5.96   | 1.34  | —  | —      | —     | —     |
|                                                           |   | 4 weeks      | 21 | 5.77   | 1.74  | 21 | -1.40 | 3.02  | 20 | 5.47   | 1.24  | 20 | -0.49  | 1.91  | 0.892 |
|                                                           |   | 12 weeks     | 18 | 6.11   | 1.82  | 18 | -1.12 | 2.22  | 16 | 5.03   | 1.76  | 16 | -1.01  | 1.62  | 0.129 |
|                                                           |   | 24 weeks     | 19 | 5.70   | 1.64  | 19 | -1.65 | 2.94  | 16 | 5.61   | 2.39  | 16 | -0.43  | 2.56  | 0.816 |
|                                                           |   | Discontinued | 2  | 4.55   | 0.92  | 2  | -0.95 | 0.78  | 3  | 4.07   | 1.32  | 3  | -1.30  | 1.84  | —     |
|                                                           | L | Baseline     | 21 | 6.83   | 1.74  | —  | —     | —     | 20 | 6.07   | 1.05  | —  | —      | —     | —     |
|                                                           |   | 4 weeks      | 21 | 5.69   | 1.54  | 21 | -1.15 | 1.87  | 20 | 5.66   | 1.45  | 20 | -0.41  | 1.97  | 0.739 |
|                                                           |   | 12 weeks     | 18 | 6.02   | 1.05  | 18 | -0.82 | 1.62  | 16 | 5.51   | 1.51  | 16 | -0.59  | 1.56  | 0.434 |
|                                                           |   | 24 weeks     | 19 | 5.71   | 1.17  | 19 | -1.28 | 1.80  | 16 | 5.96   | 2.05  | 16 | -0.13  | 2.06  | 0.416 |
|                                                           |   | Discontinued | 2  | 4.70   | 0.57  | 2  | -0.65 | 0.64  | 3  | 5.30   | 2.20  | 3  | -0.53  | 2.91  | —     |
|                                                           | B | Baseline     | 42 | 7.00   | 2.20  | —  | —     | —     | 40 | 6.01   | 1.19  | —  | —      | —     | —     |
|                                                           |   | 4 weeks      | 42 | 5.73   | 1.62  | 42 | -1.27 | 2.48  | 40 | 5.57   | 1.33  | 40 | -0.45  | 1.92  | 0.990 |
|                                                           |   | 12 weeks     | 36 | 6.06   | 1.46  | 36 | -0.97 | 1.92  | 32 | 5.27   | 1.63  | 32 | -0.80  | 1.57  | 0.128 |
|                                                           |   | 24 weeks     | 38 | 5.70   | 1.41  | 38 | -1.47 | 2.41  | 32 | 5.79   | 2.20  | 32 | -0.28  | 2.29  | 0.634 |
|                                                           |   | Discontinued | 4  | 4.63   | 0.63  | 4  | -0.80 | 0.61  | 6  | 4.68   | 1.76  | 6  | -0.92  | 2.22  | —     |
| Corneal endothelial cell density (cells/mm <sup>2</sup> ) | R | Baseline     | 21 | 2895.5 | 192.0 | —  | —     | —     | 20 | 2973.3 | 200.1 | —  | —      | —     | —     |
|                                                           |   | 4 weeks      | 21 | 2826.2 | 243.2 | 21 | -69.2 | 211.4 | 20 | 2947.5 | 228.0 | 20 | -25.8  | 162.1 | 0.336 |
|                                                           |   | 12 weeks     | 18 | 2908.3 | 200.5 | 18 | 23.6  | 179.9 | 16 | 2919.3 | 313.8 | 16 | -43.6  | 176.8 | 0.376 |
|                                                           |   | 24 weeks     | 19 | 2927.4 | 223.8 | 19 | 28.5  | 163.1 | 16 | 2954.9 | 248.0 | 16 | -7.9   | 170.3 | 0.636 |
|                                                           |   | Discontinued | 2  | 2830.0 | 186.7 | 2  | -32.5 | 142.1 | 3  | 2828.0 | 52.8  | 3  | -114.7 | 186.2 | —     |
|                                                           | L | Baseline     | 21 | 2939.1 | 223.9 | —  | —     | —     | 20 | 2907.0 | 249.1 | —  | —      | —     | —     |
|                                                           |   | 4 weeks      | 21 | 2920.0 | 192.2 | 21 | -19.1 | 150.7 | 20 | 2955.4 | 251.6 | 20 | 48.4   | 139.3 | 0.153 |
|                                                           |   | 12 weeks     | 18 | 2876.1 | 215.8 | 18 | -50.9 | 127.4 | 16 | 2931.2 | 263.8 | 16 | 22.9   | 109.2 | 0.160 |
|                                                           |   | 24 weeks     | 19 | 2923.7 | 189.4 | 19 | -11.5 | 105.3 | 16 | 2938.7 | 265.0 | 16 | 30.4   | 174.8 | 0.536 |
|                                                           |   | Discontinued | 2  | 2931.5 | 160.5 | 2  | -45.0 | 104.7 | 3  | 2777.0 | 137.2 | 3  | -81.3  | 219.2 | —     |
|                                                           | B | Baseline     | 42 | 2917.3 | 207.2 | —  | —     | —     | 40 | 2940.2 | 225.5 | —  | —      | —     | —     |
|                                                           |   | 4 weeks      | 42 | 2873.1 | 221.6 | 42 | -44.2 | 183.1 | 40 | 2951.5 | 237.0 | 40 | 11.3   | 153.8 | 0.127 |
|                                                           |   | 12 weeks     | 36 | 2892.2 | 205.9 | 36 | -13.7 | 158.2 | 32 | 2925.2 | 285.2 | 32 | -10.3  | 148.5 | 0.965 |
|                                                           |   | 24 weeks     | 38 | 2925.6 | 204.5 | 38 | 8.5   | 136.9 | 32 | 2946.8 | 252.6 | 32 | 11.3   | 170.9 | 0.982 |
|                                                           |   | Discontinued | 4  | 2880.8 | 153.7 | 4  | -38.8 | 102.2 | 6  | 2802.5 | 97.1  | 6  | -98.0  | 182.8 | —     |

VLf, violet light eyeglasses frames; N, number of eyes; SD, standard deviation; UCVA, uncorrected visual acuity; logMAR, logarithm of the minimum angle of resolution; BCVA, best-corrected visual acuity; R, right eye; L, left eye; B, both eyes; BUT, tear film break-up time.

\* Did not converge.

**Tables S3–S5. Results of the mixed-effects model fitted to the 6-month changes in the cycloplegic objective/subjective refractions and axial length in both eyes in the subgroup analysis (second-half cases aged 8 to 10 years; n = 30 eyes comprised of 10 and 20 eyes in the VLf and placebo groups, respectively).**

**Table S3.** Results of the mixed-effects model fitted to the 6-month cycloplegic objective refraction change.

| Means                                                                                                 | Partial Regression Coefficient | 95% CI           | <i>p</i> Value   |
|-------------------------------------------------------------------------------------------------------|--------------------------------|------------------|------------------|
| Treatment group: control* vs. VLf                                                                     | 0.4700                         | 0.0059 ~ 0.9340  | <b>0.048</b>     |
| Eyes: right* vs. left                                                                                 | 0.0558                         | −0.1425 ~ 0.2541 | 0.552            |
| Visit weeks: 24 weeks* vs. 4 weeks                                                                    | 0.3953                         | 0.2403 ~ 0.5503  | <b>&lt;0.001</b> |
| Age at baseline (years)                                                                               | 0.0873                         | −0.1284 ~ 0.3029 | 0.396            |
| Sex: male* vs. female                                                                                 | 0.3932                         | −0.5716 ~ 1.3580 | 0.394            |
| Parents with myopia: 1 (mother or father)* vs. 2 (both)                                               | −0.4676                        | −1.0287 ~ 0.0935 | 0.095            |
| Cycloplegic objective refraction at baseline (spherical equivalent, diopters)                         | 0.0011                         | −0.0022 ~ 0.0044 | 0.488            |
| Intraocular pressure (mmHg)                                                                           | 0.0021                         | −0.0051 ~ 0.0093 | 0.541            |
| Fluorescein corneal and conjunctival staining score                                                   | −0.0297                        | −0.7562 ~ 0.6968 | 0.930            |
| Tear film break-up time (seconds)                                                                     | −0.0115                        | −0.1746 ~ 0.1515 | 0.880            |
| Time spent in outdoor activity before entering elementary school (minutes/day): 30≤ <60* vs. 60≤ <120 | 0.3218                         | −0.2401 ~ 0.8837 | 0.236            |
| Time spend tin outdoor activity before entering elementary school (minutes/day): 30≤ <60* vs. 120≤    | 0.6639                         | −0.2399 ~ 1.5677 | 0.136            |
| Reading distance (cm)                                                                                 | 0.0048                         | −0.0257 ~ 0.0353 | 0.738            |
| Time spent sleeping (hours/day)                                                                       | −0.0041                        | −0.0147 ~ 0.0065 | 0.418            |
| Club activity: indoor* vs. outdoor                                                                    | 0.3723                         | −0.7790 ~ 1.5236 | 0.497            |
| Violet light exposure from outdoor (Joule/cm <sup>2</sup> )                                           | 0.0129                         | −0.0188 ~ 0.0446 | 0.396            |
| Time spent in near work (minutes/day)                                                                 | −0.0034                        | −0.0090 ~ 0.0022 | 0.212            |
| Time exposed to sunlight (minutes/day)                                                                | −0.0056                        | −0.0115 ~ 0.0004 | 0.066            |

VLf, violet light eyeglasses frames; CI, confidence interval.

\*Reference value.

**Table S4.** Results of the mixed-effects model fitted to the 6-month cycloplegic subjective refraction change.

| Means                                                                                                 | Partial<br>Regression<br>Coefficient | 95% CI            | <i>p</i> Value |
|-------------------------------------------------------------------------------------------------------|--------------------------------------|-------------------|----------------|
| Treatment group: control* vs. VLf                                                                     | 0.4828                               | 0.1414 ~ 0.8241   | <b>0.008</b>   |
| Eyes: right* vs. left                                                                                 | -0.0272                              | -0.1344 ~ 0.0799  | 0.588          |
| Visit weeks: 24 weeks* vs. 4 weeks                                                                    | 0.2408                               | 0.0868 ~ 0.3949   | <b>0.003</b>   |
| Age at baseline (years)                                                                               | 0.1345                               | 0.0102 ~ 0.2589   | <b>0.036</b>   |
| Sex: Male* vs. female                                                                                 | 0.1799                               | -0.3977 ~ 0.7574  | 0.512          |
| Parents with myopia: 1 (mother or father)* vs. 2 (both)                                               | -0.2625                              | -0.6169 ~ 0.0918  | 0.133          |
| Cycloplegic subjective refraction at baseline (spherical equivalent, diopters)                        | -0.0003                              | -0.0020 ~ 0.0015  | 0.752          |
| Intraocular pressure (mmHg)                                                                           | 0.0030                               | -0.0009 ~ 0.0068  | 0.117          |
| Fluorescein corneal and conjunctival staining score                                                   | 0.0873                               | -0.2987 ~ 0.4733  | 0.628          |
| Tear film break-up time (seconds)                                                                     | -0.0347                              | -0.1234 ~ 0.0540  | 0.407          |
| Time spent in outdoor activity before entering elementary school (minutes/day): 30≤ <60* vs. 60≤ <120 | 0.5324                               | 0.1703 ~ 0.8944   | <b>0.008</b>   |
| Time spent in outdoor activity before entering elementary school (minutes/day): 30≤ <60* vs. 120≤     | 0.6729                               | 0.0851 ~ 1.2607   | <b>0.028</b>   |
| Reading distance (cm)                                                                                 | 0.0166                               | 0.0002 ~ 0.0330   | <b>0.048</b>   |
| Time spent sleeping (hours/day)                                                                       | -0.0006                              | -0.0064 ~ 0.0052  | 0.816          |
| Club activity: indoor* vs. outdoor                                                                    | 0.1277                               | -0.4825 ~ 0.7379  | 0.659          |
| Violet light exposure outdoors (Joule/cm <sup>2</sup> )                                               | 0.0049                               | -0.0116 ~ 0.0214  | 0.535          |
| Time spent on near work (minutes/day)                                                                 | -0.0039                              | -0.0072 ~ -0.0005 | <b>0.029</b>   |
| Time exposed to sunlight (minutes/day)                                                                | -0.0042                              | -0.0075 ~ -0.0010 | <b>0.016</b>   |

VLf, violet light eyeglasses frames; CI, confidence interval.

\*Reference value.

**Table S5.** Results of the mixed-effects model fitted to the 6-month axial length change.

| Means                                                                                                 | Partial<br>Regression<br>Coefficient | 95% CI            | <i>p</i> Value   |
|-------------------------------------------------------------------------------------------------------|--------------------------------------|-------------------|------------------|
| Treatment group: control* vs. VLf                                                                     | -0.0927                              | -0.1660 ~ -0.0194 | <b>0.016</b>     |
| Eyes: right* vs. left                                                                                 | -0.0070                              | -0.0305 ~ 0.0166  | 0.532            |
| Visit weeks: 24 weeks* vs. 4 weeks                                                                    | -0.1811                              | -0.2125 ~ -0.1496 | <b>&lt;0.001</b> |
| Visit weeks: 24 weeks* vs. 12 weeks                                                                   | -0.0955                              | -0.1231 ~ -0.0679 | <b>&lt;0.001</b> |
| Age at baseline (years)                                                                               | 0.0249                               | -0.0038 ~ 0.0536  | 0.083            |
| Sex: male* vs. female                                                                                 | -0.1833                              | -0.3370 ~ -0.0295 | <b>0.023</b>     |
| Parents with myopia: 1 (mother or father)*<br>vs. 2 (both)                                            | 0.1084                               | 0.0419 ~ 0.1748   | <b>0.004</b>     |
| Axial length at baseline (mm)                                                                         | -0.0004                              | -0.0007 ~ 0.0000  | 0.054            |
| Intraocular pressure (mmHg)                                                                           | -0.0002                              | -0.0011 ~ 0.0006  | 0.574            |
| Fluorescein corneal and conjunctival<br>staining score                                                | -0.0500                              | -0.1429 ~ 0.0429  | 0.264            |
| Tear film break-up time (seconds)                                                                     | 0.0058                               | -0.0135 ~ 0.0251  | 0.527            |
| Time of outdoor activity before entering<br>elementary school (minutes/day): 30≤ <60*<br>vs. 60≤ <120 | -0.0368                              | -0.1120 ~ 0.0384  | 0.307            |
| Time of outdoor activity before entering<br>elementary school (minutes/day)<br>: 30≤ <60* vs. 120≤    | -0.0906                              | -0.2029 ~ 0.0218  | 0.104            |
| Reading distance (cm)                                                                                 | -0.0010                              | -0.0050 ~ 0.0030  | 0.604            |
| Time spent sleeping (hours/day)                                                                       | 0.0015                               | 0.0000 ~ 0.0031   | 0.056            |
| Club activity: indoor* vs. outdoor                                                                    | -0.1847                              | -0.3469 ~ -0.0225 | <b>0.029</b>     |
| Violet light exposure outdoors (Joule/cm <sup>2</sup> )                                               | -0.0021                              | -0.0048 ~ 0.0007  | 0.132            |
| Time spent in near work (minutes/day)                                                                 | 0.0008                               | 0.0001 ~ 0.0016   | <b>0.039</b>     |
| Time exposed to sunlight (minutes/day)                                                                | 0.0010                               | 0.0003 ~ 0.0018   | <b>0.011</b>     |

VLf, violet light eyeglasses frames; CI, confidence interval;

\*Reference value.

**Tables S6–S8. The adjusted mean changes in the cycloplegic objective and subjective refractions and axial length in both eyes at each visit in the subgroup analysis (second half cases aged 8 to 10 years; n = 30 eyes comprised of 10 and 20 eyes in the VLf and placebo groups, respectively).**

| <b>Table S6</b> | <b>Adjusted Mean Change in Cycloplegic Objective Refraction in both Eyes at Each Visit</b> |                                            |                |
|-----------------|--------------------------------------------------------------------------------------------|--------------------------------------------|----------------|
| Visit, weeks    | Control (n = 20 eyes)<br>Progression, diopters                                             | VLf (n = 10 eyes)<br>Progression, diopters | <i>P</i> value |
| 4               | −0.25 ± 0.14                                                                               | −0.01 ± 0.17                               | 0.270          |
| 24              | −0.64 ± 0.15                                                                               | −0.18 ± 0.17                               | <b>0.048*</b>  |

| <b>Table S7</b> | <b>Adjusted Mean change in Cycloplegic Subjective Refraction in both Eyes at Each Visit</b> |                                            |                |
|-----------------|---------------------------------------------------------------------------------------------|--------------------------------------------|----------------|
| Visit, weeks    | Control (n = 20 eyes)<br>Progression, diopters                                              | VLf (n = 10 eyes)<br>Progression, diopters | <i>P</i> value |
| 4               | −0.36 ± 0.09                                                                                | 0.05 ± 0.10                                | <b>0.012*</b>  |
| 24              | −0.60 ± 0.10                                                                                | −0.12 ± 0.12                               | <b>0.008*</b>  |

| <b>Table S8</b> | <b>Adjusted Mean Change in Axial Length in both Eyes at Each Visit</b> |                                     |                |
|-----------------|------------------------------------------------------------------------|-------------------------------------|----------------|
| Visit, weeks    | Control (n = 20 eyes)<br>Elongation, mm                                | VLf (n = 10 eyes)<br>Elongation, mm | <i>P</i> value |
| 4               | 0.05 ± 0.01                                                            | −0.01 ± 0.02                        | <b>0.020*</b>  |
| 12              | 0.14 ± 0.01                                                            | 0.07 ± 0.02                         | <b>0.015*</b>  |
| 24              | 0.23 ± 0.02                                                            | 0.14 ± 0.03                         | <b>0.016*</b>  |

The data are expressed as the estimated values ± standard errors.

VLf, violet light eyeglasses frames; \*Statistically significant.
